# Supplementary material for: The Management of Immunosuppression in Kidney Transplant Recipients with COVID-19 Disease: An Update and Systematic Review of the Literature
Source: MDPI journal article supplement (doi:10.3390/medicina57050435), 2021-04-30
Supplement: s1 [file s1]

**Table S1.** Quality of evidence in the selected papers for the systematic review according to the Newcastle-Ottawa Scale.

| Author                       | References | Author selection<br>(Max 4 stars) | Comparability<br>(Max 2 stars) | Outcome/Exposure (Max<br>3 stars) | Total of stars |
|------------------------------|------------|-----------------------------------|--------------------------------|-----------------------------------|----------------|
| Akdur et al.                 | 11         | Case Report                       |                                |                                   | 0              |
| Allam et al.                 | 12         | Case Report                       |                                |                                   | 0              |
| Bartiromo et al.             | 13         | Case Report                       |                                |                                   | 0              |
| Billah et al.                | 14         | Case Report                       |                                |                                   | 0              |
| Bussalino et al.             | 15         | Case Report                       |                                |                                   | 0              |
| Chen et al.                  | 16         | Case Report                       |                                |                                   | 0              |
| Cheng et al.                 | 17         | Case Report                       |                                |                                   | 0              |
| Chenna et al.                | 18         | Case Report                       |                                |                                   | 0              |
| Dahl et al                   | 19         | Case Report                       |                                |                                   | 0              |
| Dirim et al.                 | 20         | Case Report                       |                                |                                   | 0              |
| Fontana et al.               | 21         | Case Report                       |                                |                                   | 0              |
| Gandolfini et<br>al.         | 22         | Case Report                       |                                |                                   | 0              |
| Guillen et al.               | 23         | Case Report                       |                                |                                   | 0              |
| Hasan Ahmad<br>et al.        | 24         | Case Report                       |                                |                                   | 0              |
| Hsu et al.                   | 25         | Case Report                       |                                |                                   | 0              |
| Huang et al.                 | 26         | Case Report                       |                                |                                   | 0              |
| Jiang et al.                 | 27         | Case Report                       |                                |                                   | 0              |
| Kates et al.                 | 28         | Case Report                       |                                |                                   | 0              |
| Kemmner et al.               | 29         | Case Report                       |                                |                                   | 0              |
| Kim et al.                   | 30         | Case Report                       |                                |                                   | 0              |
| Kocak et al.                 | 31         | Case Report                       |                                |                                   | 0              |
| Kolonko et al.               | 32         | Case Report                       |                                |                                   | 0              |
| Kumar et al.                 | 33         | Case Report                       |                                |                                   | 0              |
| Lauterio et al.              | 34         | Case Report                       |                                |                                   | 0              |
| Li.Q                         | 35         | Case Report                       |                                |                                   | 0              |
| Ma et al.                    | 36         | Case Report                       |                                |                                   | 0              |
| Machado et al.               | 37         | Case Report                       |                                |                                   | 0              |
| Man et al.                   | 38         | Case Report                       |                                |                                   | 0              |
| Marx et al.                  | 39         | Case Report                       |                                |                                   | 0              |
| Meziyerh et al.              | 40         | Case Report                       |                                |                                   | 0              |
| Namazee et al.               | 41         | Case Report                       |                                |                                   | 0              |
| Ning et al.                  | 42         | Case Report                       |                                |                                   | 0              |
| <u>Sakulkonkij</u> et<br>al. | 43         | Case Report                       |                                |                                   | 0              |
| Seminari et al.              | 44         | Case Report                       |                                |                                   | 0              |
| Shingare et al.              | 45         | Case Report                       |                                |                                   | 0              |
| Sj Antony et al.             | 46         | Case Report                       |                                |                                   | 0              |
| Suwanwongse<br>et al.        | 47         | Case Report                       |                                |                                   | 0              |
| Tanaka et al                 | 48         | Case Report                       |                                |                                   | 0              |
| Tantisattamo et<br>al.       | 49         | Case Report                       |                                |                                   | 0              |
| Thammathiwat<br>et al.       | 50         | Case Report                       |                                |                                   | 0              |
| Tzukert T. et al.            | 51         | Case Report                       |                                |                                   | 0              |
| Velioglu et al.              | 52         | Case Report                       |                                |                                   | 0              |
| Wang et al.                  | 53         | Case Report                       |                                |                                   | 0              |
| Wang et al.                  | 54         | Case Report                       |                                |                                   | 0              |
| Xu et al.                    | 55         | Case Report                       |                                |                                   | 0              |
| Zhong et al.                 | 56         | Case Report                       |                                |                                   | 0              |

|                          |    |                   |   |  |    |   |
|--------------------------|----|-------------------|---|--|----|---|
| Zhu et al.               | 57 | Case Report       |   |  |    | 0 |
| Zhu et al.               | 58 | Case Report       |   |  |    | 0 |
| Akalin et al.            | 59 | Case series       |   |  |    | 0 |
| Alberici et al.          | 60 | Case series       |   |  |    | 0 |
| Banerjee et al.          | 61 | Case series       |   |  |    | 0 |
| Bosch et al.             | 62 | Case series       |   |  |    | 0 |
| Chen et al.              | 63 | Case series       |   |  |    | 0 |
| Columbia University      | 64 | Case series       |   |  |    | 0 |
| Crespo et al.            | 65 | Case series       |   |  |    | 0 |
| Devresse et al.          | 66 | Case series       |   |  |    | 0 |
| Elias et al.             | 67 | Prospective study |   |  |    | 0 |
| Fernandez-Riuz et al.    | 68 | Case series       |   |  |    | 0 |
| Fung et al.              | 69 | Case series       |   |  |    | 0 |
| Hartzell et al.          | 70 | Case series       |   |  |    | 0 |
| Lubetzky et al.          | 71 | Case series       |   |  |    | 0 |
| Maritati et al.          | 72 | Case series       |   |  |    | 0 |
| Mehta et al.             | 73 | Case series       |   |  |    | 0 |
| Mella et al.             | 74 | Case series       |   |  |    | 0 |
| Monfaret et al.          | 75 | Case series       |   |  |    | 0 |
| Nair et al.              | 76 | Case series       |   |  |    | 0 |
| Pierotti et al.          | 77 | Case series       |   |  |    | 0 |
| Rodriguez-Cubillo et al. | 78 | Case series       |   |  |    | 0 |
| Silva et al.             | 79 | Case series       |   |  |    | 0 |
| Trujillo et al.          | 80 | Case series       |   |  |    | 0 |
| Zhu et al.               | 81 | ++++              | + |  | ++ | 7 |
